# Supplementary material for: Simple combination of humic acid with biogenic hydroxyapatite achieved highly efficient removal of methylene blue from aqueous solution
Source: Royal Society of Chemistry journal article supplement (doi:10.1039/c6ra08715a), 2016-01-01
Supplement: c6ra08715a1.pdf [file c6ra08715a1.pdf]

*Electronic Supplementary Material*

**Simple combination of humic acid with biogenic hydroxyapatite achieved highly efficient removal of methylene blue from aqueous solution**

Gang Wang <sup>a,b,c,d</sup>, Lei Yang <sup>a</sup>, Ling Jiang <sup>a</sup>, Mengqi Shi <sup>a</sup>, Zhenggui Wei <sup>a,b,c,d</sup>, Wenhui Zhong <sup>a,b,c,d</sup>, Shiyin Li <sup>a</sup>, Jing Cui <sup>a</sup>, Wei Wei <sup>a,b,c,d</sup> \*

<sup>a</sup> Jiangsu Provincial Key Laboratory of Materials Cycling and Pollution Control, School of the Environment, Nanjing Normal University, Nanjing 210023, China

<sup>b</sup> Key Laboratory of Virtual Geographic Environment (Nanjing Normal University), Ministry of Education, Nanjing, 210023, China

<sup>c</sup> State Key Laboratory Cultivation Base of Geographical Environment Evolution (Jiangsu Province), Nanjing, 210023, China

<sup>d</sup> Jiangsu Center for Collaborative Innovation in Geographical Information Resource Development and Application, Nanjing 210023, China

\* Corresponding author. Tel.: +86 25 85891347; fax: +86 25 85891347.

Email: wwei@njnu.edu.cn (W. Wei)

## 1. Mathematical models

The pseudo-first-order (eq. 1) [1], pseudo-second-order (eq. 2) [2], and intra-particle diffusion model (eq. 3) [3] were used to simulate the adsorption kinetics.

$$\ln(q_e - q_t) = \ln q_e - k_1 t \quad (1)$$

$$\frac{t}{q_t} = \frac{1}{k_2 q_e^2} + \frac{t}{q_e} \quad (2)$$

$$q_t = k_p t^{1/2} + C \quad (3)$$

where  $q_e$  (mg/g) is the amount of adsorbate adsorbed per unit adsorbent at equilibrium;  $q_t$  (mg/g) is the amount of MB adsorbed at time  $t$ ;  $k_1$  (1/min),  $k_2$  (g/(mg·min)), and  $k_p$  (mg/(g·min<sup>-1/2</sup>)) are the rate constants for the pseudo-first-order, pseudo-second-order and intra-particle diffusion models, respectively;  $C$  (mg/g) is the intercept which provides an idea of the boundary layer thickness. Herein, the initial adsorption rate ( $v_0$ ) is calculated as:  $v_0 = k_2 q_e^2$  for the pseudo-second-order model.

Langmuir (4) [4], Freundlich (5) [5] and Sips (also known as Langmuir-Freundlich) isotherm models (6) [6] were used to describe the adsorption of MB on the HA-bHAP adsorbent:

$$q_e = \frac{q_m K_L C_e}{1 + K_L C_e} \quad (4)$$

$$q_e = K_F C_e^{1/n} \quad (5)$$

$$q_e = \frac{q_m (K_S C_e)^{1/n}}{1 + (K_S C_e)^{1/n}} \quad (6)$$

where  $K_L$  (L/mg),  $K_F$  [mg/g(L/mg)<sup>1/n</sup>] and  $K_S$  (L/mg) are the equilibrium constants of Langmuir, Freundlich and Sips models, respectively;  $q_e$ (mg/g) is the adsorption capacity at equilibrium;  $C_e$ (mg/L) is the equilibrium concentration of HA in solution;  $q_m$  (mg/g) is the maximum adsorption capacity, and  $1/n$  is the heterogeneity factor. If

the value of  $K_S$  or  $C_e$  approaches to zero, Sips isotherm equation follows the Freundlich isotherm model, while the value of  $1/n$  equal or close to 1, the Sips isotherm equation reduced to the Langmuir isotherm.

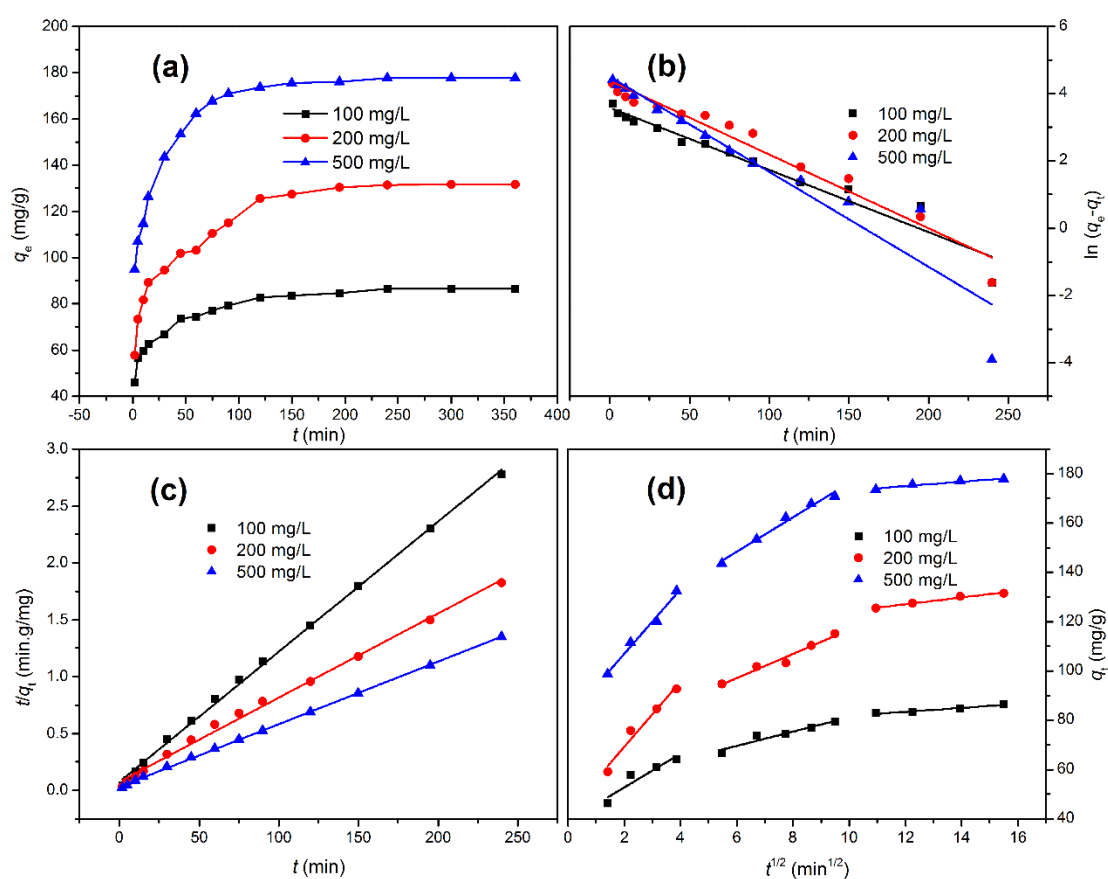

Figure S1. (a) Effect of contact time and initial metal concentration on adsorption capacity of MB onto HA-bHAP; the fitting of different kinetic models for MB adsorption onto HA-bHAP at different initial concentrations ((b) pseudo-first-order, (c) pseudo-second-order, (d) intra-particle diffusion). (Adsorption conditions: adsorbent dosage = 1.0 g/L, initial pH = 7.0, and temperature = 298 K).

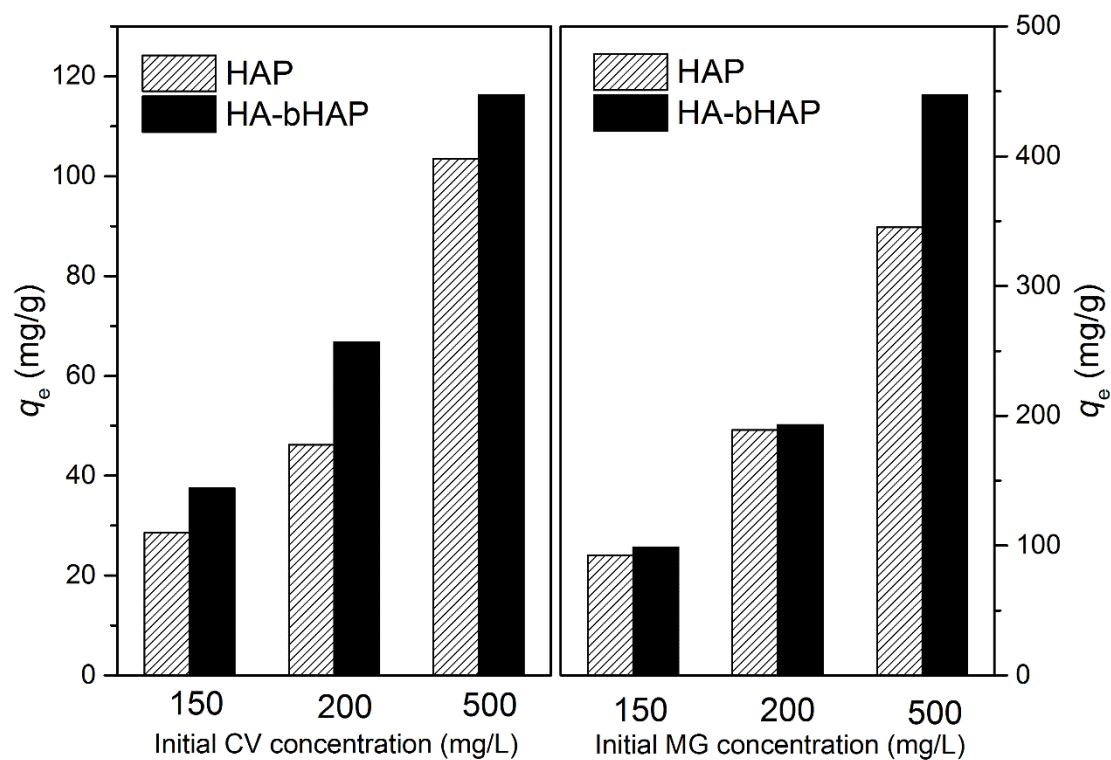

**Figure S2.** Comparison of crystal violet (CV) and malachite green (MG) adsorption onto bHAP and HA-bHAP. (Adsorption conditions: adsorbent dosage = 1.0 g/L, initial pH 7.0, and temperature = 298 K).

## References

- [1] S. Lagergren, About the theory of so-called adsorption of soluble substance, *Kungliga Svenska Ventenskapsakademiens Handlingar*, 1898, 24, 1-39.
- [2] Y.S. Ho, G. Mckay, Pseudo-second order model for sorption processes, *Process Biochem.*, 1999, 34, 451-465.
- [3] W.J. Weber, C.J. Morris, Kinetic of adsorption on carbon from solution, *J. Sanit. Eng. Div. Am. Soc. Civ. Eng.* 1963, 89, 31-59.
- [4] I. Langmuir, The constitution and fundamental properties of solid and liquids, Part 1. Solid, *J. Am. Chem. Soc.*, 1916, 39, 2221-2295.

- [5] H.M.F. Freundlich, Over the adsorption in solution, J. Phys. Chem., 1906, 57, 385-470.
- [6] R. Sips, Combined form of Langmuir and Freundlich equations, J. Chem. Phys., 1948, 16, 490-495.
